# Supplementary material for: Medicaid Prior-Authorization Programs and the Use of Cyclooxygenase-2 Inhibitors
Source: Atypon-hosted journal article supplement (doi:10.1056/nejmsa042770), 2004-11-17
Supplement: 2187sa1.pdf [file 2187sa1.pdf]

# Supplementary Appendix 1

This appendix has been provided by the authors to give readers additional information about their work.

Supplement to: Fischer MA, Schneeweiss S, Avorn J, Solomon DH. Medicaid prior-authorization programs and the use of cyclooxygenase-2 inhibitors. *N Engl J Med* 2004;351:2187-94.

## Supplementary Appendix

This appendix has been provided by the authors to give readers additional information about their work.

### Specification of the Linear Regression Model and Table of Results

$$\text{Coxib}\% = \beta_0 + \beta_1 \text{time} + \beta_2 \text{PA\_indicator} + \beta_3 \text{Post\_indicator} + \beta_4 \text{Post\_trend} + \beta_5 \text{PA\_indicator} * \text{Post\_indicator} + \beta_6 \text{PA\_indicator} * \text{Post\_trend} + \varepsilon$$

### Explanation of Terms

Time: Time variable to measure secular trend throughout the study period (0 to 12)

PA\_indicator: Indicator variable for states with prior authorization (1 vs. 0)

Post\_indicator: Indicator variable for quarter falling after intervention (1 vs. 0)

Post\_trend: Time variable measuring trend after intervention (1 to 6)

PA\_indicator\*Post\_indicator: Interaction term, measures the level effect of intervention adjusted for utilization time trends for the states without prior authorization

PA\_indicator\*Post\_trend: Interaction term, measures the slope effect of intervention adjusted for utilization time trends for the states without prior authorization

| Parameter           | Coefficient   | Standard Error* | z-score | P-value | 95% Confidence Interval |         |
|---------------------|---------------|-----------------|---------|---------|-------------------------|---------|
| Time                | .0120         | .00323          | 3.73    | 0.000   | .00571                  | .01836  |
| PA_ind              | -.0517        | .02161          | -2.39   | 0.017   | -.09401                 | -.00930 |
| Post_ind            | .0223         | .01516          | 1.47    | 0.141   | -.00737                 | .05204  |
| Post_trend          | -.0182        | .00671          | -2.71   | 0.007   | -.03134                 | -.00503 |
| PA_ind_x Post ind   | <b>-.1501</b> | .02122          | -7.08   | 0.000   | -.19174                 | -.10856 |
| PA_ind_x Post trend | <b>.0162</b>  | .00747          | 2.16    | 0.030   | .00153                  | .03081  |

\* Generalized estimating equation estimates assuming an autoregressive correlation structure

**Table 1 (Expanded): Trends in NSAID and coxib utilization and spending in Medicaid, 1999-2003, by calendar quarter\***

| Year, quarter | Number of states | Total NSAID prescriptions | Total NSAID DDD's | % coxib DDD's | Total enrollment† | Elderly enrollment† | Total NSAID spending | Coxib spending |
|---------------|------------------|---------------------------|-------------------|---------------|-------------------|---------------------|----------------------|----------------|
| 1999,1        | 43               | 2,435,824                 | 82,850,359        | 4%            | 32,800,000        | 3,800,000           | \$ 68,831,169        | \$ 8,959,602   |
| 1999,2        | 43               | 2,514,794                 | 85,830,703        | 17%           |                   |                     | \$ 86,323,687        | \$ 34,592,785  |
| 1999,3        | 41               | 2,596,052                 | 88,480,226        | 26%           |                   |                     | \$ 101,049,558       | \$ 55,837,376  |
| 1999,4        | 42               | 2,929,463                 | 99,411,058        | 33%           |                   |                     | \$ 130,093,387       | \$ 81,574,154  |
| 2000,1        | 40               | 3,075,587                 | 104,573,767       | 39%           | 34,000,000        | 3,900,000           | \$ 147,204,639       | \$ 100,399,073 |
| 2000,2        | 43               | 3,288,027                 | 113,394,034       | 45%           |                   |                     | \$ 169,857,362       | \$ 124,398,851 |
| 2000,3        | 46               | 3,619,018                 | 125,411,291       | 48%           |                   |                     | \$ 191,048,535       | \$ 144,228,512 |
| 2000,4        | 48               | 3,875,212                 | 134,800,344       | 50%           |                   |                     | \$ 206,333,414       | \$ 158,883,317 |
| 2001,1        | 48               | 3,931,652                 | 135,613,264       | 51%           | 37,700,000        | 4,000,000           | \$ 210,420,381       | \$ 168,523,921 |
| 2001,2        | 49               | 4,058,119                 | 141,981,412       | 52%           |                   |                     | \$ 222,900,819       | \$ 180,286,340 |
| 2001,3        | 49               | 4,064,012                 | 141,203,647       | 53%           |                   |                     | \$ 222,971,280       | \$ 180,096,441 |
| 2001,4        | 47               | 4,177,580                 | 144,342,441       | 52%           |                   |                     | \$ 230,704,123       | \$ 185,773,824 |
| 2002,1        | 50               | 4,093,701                 | 140,991,154       | 52%           | 39,900,000        | 4,200,000           | \$ 230,081,448       | \$ 187,259,894 |
| 2002,2        | 50               | 4,151,630                 | 143,772,789       | 53%           |                   |                     | \$ 235,432,543       | \$ 192,801,712 |
| 2002,3        | 50               | 4,393,086                 | 154,606,911       | 52%           |                   |                     | \$ 248,422,006       | \$ 202,342,070 |
| 2002,4        | 50               | 4,388,890                 | 155,238,710       | 53%           |                   |                     | \$ 248,759,212       | \$ 203,763,021 |
| 2003,1        | 49               | 4,146,673                 | 146,726,366       | 52%           | 41,400,000        | 4,300,000           | \$ 237,409,007       | \$ 195,176,533 |
| 2003,2        | 50               | 4,353,754                 | 155,513,965       | 50%           |                   |                     | \$ 245,749,778       | \$ 198,948,300 |
| 2003,3        | 50               | 4,649,853                 | 166,158,128       | 49%           |                   |                     | \$ 261,246,051       | \$ 210,341,258 |
| 2003,4        | 50               | 4,806,690                 | 170,721,953       | 47%           |                   |                     | \$ 262,856,695       | \$ 208,758,593 |

\*No data were provided for Mississippi and Texas in 1999 and for Rhode Island in 2000. Arizona did not provide data in any years.

†Enrollment data refer to person-years of enrollment and are projections for the fiscal years listed, prepared by the Office of the Actuary for the President's fiscal year 2004 budget.<sup>17</sup>
